# Supplementary material
Source: Research Square preprint supplement (doi:10.21203/rs.3.rs-9774498/v1)
Supplement: Supplementary file 1 [file db0dafd2dc0c80392d5b565a.doc]

**Supplemental Table 1 Hardy-Weinberg equilibrium values calculated separately for NIDGS and SIDGS. Values in italics are significant at α=0.05. Values in bold are significant after Bonferroni correction.**

NIDGS

| Pop | | B109 | B126 | D117 | | GS12 | | GS17 | | GS26 | | GS3 | | IGS110b | Bibl36 | | |
| --- | --- | --- | --- | --- | --- | --- | --- | --- | --- | --- | --- | --- | --- | --- | --- | --- | --- |
| ChS (06) | 0.6662 | | 1.0000 | | 0.3121 | | 0.3888 | | 0.8173 | | 0.1643 | 0.5299 | - | | | 0.2908 |  |
| ChS (02) | | 1.0000 | 0.1014 | 0.7432 | | 0.5854 | | 0.3433 | | 1.0000 | | 1.0000 | | - | 1.0000 | | |
| CS (06) | | *0.0013* | 0.0538 | 0.6230 | | *0.0104* | | **0.0001** | | *0.0027* | | *0.0111* | | *0.0468* | **0.0000** | | |
| CS (02) | | 0.2014 | 0.6922 | 0.7457 | | 0.3444 | | 0.2495 | | 0.1515 | | 0.1633 | | 1.0000 | 0.3199 | | |
| CW (06) | | 1.0000 | 1.0000 | 0.5169 | | 0.5560 | | - | | 1.0000 | | 1.0000 | | 1.0000 | 0.3251 | | |
| HU (06) | | 0.8190 | 0.1751 | 0.5213 | | *0.0479* | | 0.5847 | | 0.1380 | | *0.0258* | | 0.1777 | 0.4556 | | |
| HW (06) | 0.1298 | | 0.2071 | | 0.1410 | | 0.6323 | | 0.0695 | | 0.6524 | 0.1357 | *0.0033* | | | 0.1251 |  |
| LCL (06) | 0.6829 | | *0.0245* | | 0.5844 | | **0.0001** | | 0.0851 | | *0.0011* | *0.0116* | 0.1821 | | | *0.0250* |  |
| LM (06) | 0.2100 | | 0.2357 | | 0.1883 | | 0.6694 | | 1.0000 | | 0.0563 | *0.0341* | 0.0890 | | | 0.0871 |  |
| LV (06) | 0.2564 | | 0.7506 | | 0.6914 | | *0.0040* | | *0.0039* | | 1.0000 | 1.0000 | 1.0000 | | | *0.0403* |  |
| LV (02) | 0.8754 | | 0.5424 | | 0.0989 | | 0.7186 | | 0.7143 | | 0.5314 | 0.5312 | 0.6955 | | | 0.2593 |  |
| PV (02) | 0.3286 | | 0.8802 | | 0.6087 | | 0.2283 | | 1.0000 | | 0.6317 | 0.6777 | 0.5782 | | | 0.2576 |  |
| RT (06) | 0.7735 | | 0.5666 | | 0.3896 | | 0.0978 | | *0.0029* | | 0.5710 | 1.0000 | *0.0086* | | | 0.4885 |  |
| RV (06) | *0.0082* | | *0.0238* | | **0.0001** | | 0.1815 | | *0.0059* | | - | 0.0691 | *0.0197* | | | 0.2372 |  |
| SG (06/02) | 0.5584 | | 0.1250 | | 0.2850 | | 0.0742 | | 0.2119 | | *0.0245* | 0.7223 | 1.0000 | | | 0.0589 |  |
| SM (02) | *0.0350* | | 0.2417 | | 0.2030 | | 0.5958 | | 0.8417 | | 0.5353 | 0.6236 | 0.3609 | | | 0.4496 |  |
| TF (02) | *0.0017* | | *0.0152* | | 0.0925 | | **0.0000** | | *0.0019* | | *0.0026* | *0.0004* | 0.2549 | | | 0.2059 |  |
| TF (06) | 0.2748 | | 0.1379 | | 0.7364 | | 0.6297 | | 0.4768 | | 1.0000 | 0.1266 | 0.5222 | | | 0.1062 |  |
| SIDGS  BC (06/02) | 0.6404 | | 0.3364 | | 0.3735 | | 0.5744 | | 0.8233 | | 0.7940 | 1.0000 | 0.1072 | | | n/a |  |
| CP (02) | 0.1125 | | 0.3853 | | 0.0528 | | 0.7339 | | 0.8086 | | 0.2834 | - | - | | | n/a |  |
| HB (02) | 0.8253 | | 1.0000 | | - | | 1.0000 | | - | | 1.0000 | - | - | | | n/a |  |
| HG (02) | 0.0982 | | 1.0000 | | 0.8642 | | 1.0000 | | 0.2638 | | 1.0000 | - | - | | | n/a |  |
| MC (06) | 0.6625 | | 1.0000 | | 0.0732 | | 1.0000 | | 0.9226 | | 0.0312 | 1.0000 | - | | | n/a |  |
| PFS (06) | 0.7622 | | 0.1113 | | 0.3794 | | 0.6209 | | 0.3425 | | 1.0000 | - | - | | | n/a |  |
| RH (06) | 1.0000 | | 0.1168 | | 0.4462 | | 1.0000 | | 1.0000 | | 0.5251 | - | - | | | n/a |  |
| RH (02) | 0.2305 | | 0.4707 | | 0.7563 | | 0.8411 | | 1.0000 | | 0.6535 | - | - | | | n/a |  |
| HC (06/02) | 0.6313 | | **0.0000** | | 0.8461 | | 1.0000 | | 0.6970 | | 0.7472 | - | - | | | n/a |  |
| SB (06) | *0.0398* | | 0.4257 | | 0.0650 | | 0.5595 | | 0.1395 | | 0.6341 | - | 1.0000 | | | n/a |  |
| SB (02) | 1.0000 | | 0.9850 | | 0.9280 | | 1.0000 | | 0.0795 | | 1.0000 | - | 1.0000 | | | n/a |  |
| SH (02) | **0.0000** | | 0.4062 | | 0.2240 | | 0.1943 | | 0.5148 | | 0.6990 | 1.0000 | 1.0000 | | | n/a |  |
| Sk (02) | 0.1018 | | 0.7632 | | 0.2831 | | 1.0000 | | 0.1711 | | 1.0000 | - | - | | | n/a |  |

**Supplemental Table 2 Hardy-Weinberg equilibrium values calculated separately for NIDGS and SIDGS when 2002 and 2006 sampling periods are combined. Values in italics are significant at α=0.05. Values in bold are significant after Bonferroni correction.**

| Pop | B109 | B126 | D117 | GS12 | GS17 | GS26 | GS3 | IGS110b | Bibl36 |
| --- | --- | --- | --- | --- | --- | --- | --- | --- | --- |
| ChS | 1 | 0.0814 | 0.383 | 0.5469 | 0.9282 | 0.5549 | 0.6144 | - | 0.2549 |
| CS | 0.1216 | 0.3933 | 0.6765 | 0.0638 | **0.0003** | 0.195 | *0.0008* | *0.0336* | *0.0029* |
| CW | 1 | 1 | 0.5077 | 0.5547 | - | 1 | 1 | 1 | 0.3068 |
| HU | 0.819 | 0.1754 | 0.5312 | 0.0581 | 0.5868 | 0.1367 | *0.0245* | 0.1734 | 0.4319 |
| HW | 0.1309 | 0.1995 | 0.135 | 0.6349 | 0.0637 | 0.6394 | 0.1379 | *0.003* | 0.1272 |
| LCL | 0.6875 | *0.0301* | 0.5867 | *0.0007* | 0.0848 | *0.001* | *0.011* | 0.1746 | *0.0236* |
| LM | 0.2124 | 0.2318 | 0.1845 | 0.6725 | 1 | 0.0587 | *0.0332* | 0.088 | 0.0866 |
| LV | 0.1112 | 0.4338 | 0.2048 | *0.0211* | 0.0848 | 0.3033 | 0.4078 | 0.7198 | 0.077 |
| PV | 0.3188 | 0.8816 | 0.6161 | 0.2267 | 1 | 0.6318 | 0.6762 | 0.5562 | 0.2322 |
| RT | 0.7749 | 0.57 | 0.3726 | 0.1003 | *0.0033* | 0.5758 | 1 | *0.0086* | 0.49 |
| RV | *0.0093* | *0.0226* | **0.0000** | 0.175 | *0.0065* | - | 0.0683 | *0.0193* | 0.2362 |
| SG | 0.5307 | 0.1021 | 0.2899 | 0.0713 | 0.214 | *0.0226* | 0.7213 | 1 | *0.0493* |
| SM | *0.0303* | 0.2515 | 0.1963 | 0.591 | 0.8377 | 0.5275 | 0.6253 | 0.3506 | 0.4522 |
| TF | *0.0431* | 0.2463 | 0.4281 | *0.0348* | *0.0488* | *0.0038* | *0.0015* | 0.1103 | *0.0398* |
| BC | 0.6672 | 0.3580 | 0.3736 | 0.5065 | 0.8515 | 0.7823 | 1.0000 | 0.1068 | n/a |
| CP | 0.1220 | 0.3790 | 0.0535 | 0.7481 | 0.8071 | 0.2766 | - | - | n/a |
| HB | 0.8236 | 1.0000 | - | 1.0000 | - | 1.0000 | - | - | n/a |
| HG | 0.1000 | 1.0000 | 0.8679 | 1.0000 | 0.2713 | 1.0000 | - | - | n/a |
| MC | 0.6614 | 1.0000 | 0.0698 | 1.0000 | 0.9186 | *0.0337* | 1.0000 | - | n/a |
| PFS | 0.7536 | 0.1074 | 0.4029 | 0.6280 | 0.3411 | 1.0000 | - | - | n/a |
| RH | 0.1401 | 0.3553 | 0.1119 | 0.8061 | 0.8927 | 0.4323 | - | - | n/a |
| HC | 0.6427 | **0.0001** | 0.8447 | 1.0000 | 0.7002 | 0.7396 | - | - | n/a |
| SB | *0.0363* | 0.4248 | 0.1523 | 0.3752 | 0.2445 | 0.4314 | - | 1.0000 | n/a |
| SH | **0.0000** | 0.4152 | 0.2152 | 0.2045 | 0.5014 | 0.7040 | 1.0000 | 1.0000 | n/a |
| Sk | 0.1061 | 0.7626 | 0.2915 | 1.0000 | 0.1744 | 1.0000 | - | - | n/a |

**Supplemental Table 3 Error values calculated per locus from 30 blind re-runs for NIDGS and SIDGS.**

| **Locus** | **# False Alleles** | **% Allelic drop out** |
| --- | --- | --- |
| B109 | 0.75 | 0.75 |
| B126 | 1.55 | 2.22 |
| D117 | 0.11 | 3.02 |
| GS12 | 0.66 | 2.38 |
| GS17 | 0.59 | 3.85 |
| GS26 | 1.31 | 2.74 |
| GS3 | 0.70 | 2.80 |
| IDS110b | 0.81 | 2.89 |
| Bib135 | 1.19 | 0 |
| Sex ID | 0 | 2.10 |
| Avg | 0.7 | 2.28 |

**Supplemental Table 4** Microsatellite summary statistics recalculated for comparison across sub-species. Calculations were based on 8 loci for HE and HO. A.R. is based on the lowest sampling size of 6 individuals. Abbreviations follow Table 1.

| **(A)** | Sampling area | A.R. | HE | HO |
| --- | --- | --- | --- | --- |
|  | ChS | 3.24 | 0.576 | 0.535 |
|  | CS | 3.36 | 0.577 | 0.440 |
|  | CW | 3.00 | 0.584 | 0.571 |
|  | HU | 2.56 | 0.465 | 0.377 |
|  | HW | 2.92 | 0.595 | 0.468 |
|  | LCL | 3.08 | 0.564 | 0.386 |
|  | LM | 2.94 | 0.536 | 0.407 |
|  | LV | 3.51 | 0.617 | 0.551 |
|  | PV | 3.38 | 0.603 | 0.604 |
|  | RT | 3.59 | 0.658 | 0.529 |
|  | RV | 2.12 | 0.393 | 0.194 |
|  | SG | 3.27 | 0.589 | 0.498 |
|  | SM | 3.41 | 0.618 | 0.634 |
|  | TF | 3.27 | 0.547 | 0.464 |
|  | **Average:** | 3.12 | 0.566 | 0.476 |
|  |  |  |  |  |
| **(B)** | BC | 3.32 | 0.514 | 0.501 |
|  | CP | 2.93 | 0.624 | 0.650 |
|  | HB | 1.77 | 0.308 | 0.333 |
|  | HG | 3.16 | 0.664 | 0.633 |
|  | MC | 2.66 | 0.473 | 0.504 |
|  | PFS | 2.70 | 0.549 | 0.561 |
|  | RH | 2.55 | 0.548 | 0.596 |
|  | HC | 2.35 | 0.435 | 0.436 |
|  | SB | 2.69 | 0.479 | 0.459 |
|  | SH | 2.96 | 0.481 | 0.474 |
|  | Sk | 3.05 | 0.567 | 0.590 |
|  | **Average:** | 2.74 | 0.513 | 0.523 |
